# Supplementary material
Source: publisher figshare collection journal article supplement (https://tandf.figshare.com/ndownloader/files/30926989)
Supplement: Supplementary file 1 [file 30926989]

Archive with 3 entries (3 files):
- SupplementaryMaterial/ChunkandDeal.zip
- SupplementaryMaterial/README.txt
- SupplementaryMaterial/supplementarymaterials.pdf
