# Supplementary material
Source: publisher figshare collection journal article supplement (https://tandf.figshare.com/ndownloader/files/30926989)
Supplement: Supplementary file 1 [file 30926989 › SupplementaryMaterial/README.txt]

The code in this folder relates to the paper "Parallelisation of a Common Changepoint Detection Method" (Tickle, Eckley, Fearnhead and Haynes, 2018).

The files of interest to the user are PELT, chunk and deal. Here you will find the functions necessary for running the PELT and its parallel
extensions discussed in the paper.

The file simstudyPAPERwithcost is capable of replicating the simulations seen in the paper. 

Other functions included in this folder are background functions called by the other functions mentioned above.

*********
**FILES**
*********

########################
#Functions within files#
########################

*******
*chunk*
*******

#######
#chunk#
#######

#the chunk function is one of the two methods for parallelising PELT we propose. It works by segmenting the data sequence into continuous "chunks"
#with some overlap between the segments such that some time points close to the boundary are in two segments at once.  Each segment/chunk is then
#given to a separate core and PELT is applied to the reduced dataset. The results are then returned to the core which initially segmented the 
#sequence and a global changepoint model is fitted based on the candidate changepoints returned from each of the cores.

#data - this should be a sequence on which to search for changepoints

#penalty - the penalty term which is added to the model when a changepoint is introduced, in the same manner as for unparallelised PELT; the 
#default value is based on the assumption that we have a change in mean problem under Gaussian noise which is unknown. mad(data) estimates the
#standard deviation, and the 2 log((length(data))) term originates from corresponding theory.

#pruning - TRUE/FALSE, indicates whether (inequality-based) pruning will be carried out. As shown by Killick et al. (2012), for the PELT procedure 
#this will only affect the computational cost.

#sum.stat - this function determined which summary statistics will be calculated from the data, based on parametric assumptions. For a full list
#of options, please see the cost_functions.R file.

#cost - this function gives the cost of the segment base3d on the summary statistics reported from the sum.stat function, for example, in the normal
#change in mean setting, we take cost to be norm.mean.cost. Other options appear in the cost_functions.R file.

#ncores - the number of cores over which the method will be parallelised. The default is 2.

#boundary - TRUE/FALSE, indicates whether the method will segment the data into segments without any overlap, or whether a boundary will in fact be
#used. From the theory and discussions in the paper, it is expedient to select a bounday of O(log n). Here, if TRUE is selected (and it is the 
#default) then a boundary of length ceil((log n)^2) is used.

#minseglen - the minimum spacing between two successive changepoints. It is typical to take this as 2. In practice, as seen from the proof of
#Proposition 3.1 (the consistency of PELT in the change in mean setting under Gaussian noise), the minimum period required for no changes in
#the finite sample setting to ensure consistency is 2.

*******************
*Chunk_functions.R*
*******************

#############
#chunk_step1#
#############

#chunk_step1 is the `split phase' function for the chunk procedure, which takes a chunk given to it by the basic chunk function and applied PELT to
#the chunk as opposed to the entire series. The arguments are as follows:

#sumx - a matrix of salient summary statistics given to the function by the chunk function. In the case of change in mean under normal noise, this
#includes the cumulative sum and the cumulative sums of squares.

#pen - a penalty term; i.e. cost incurred for introducing a changepoint to the model; the chunk procedure, which is a wrapper for this function, 
#gives this a default value 2*\sigma^2*log(n), where \sigma^2 is an estimate of the variance (which, in a change in mean setting, is assumed to be
#constant, if perhaps unknown, across the time series).

#PRUNE - TRUE/FALSE; determines whether pruning in the style of PELT (i.e. inequality-based pruning) will take place. The main affect on the final 
#answer will be a further reduction computational cost - there will be little or no impact on the fit returned by the method.

#cost - segmented cost function from the cost_functions.R library. Please see cost_functions.R for a more thorough discussion.

#minseglen- The minimum spacing between two successive changepoints. Setting this to be at least 2 is advisable.

#coreID - the number of the core within the cluster in which this function operates. This is given to the function by the chunk wrapper.

#ncores - the total number of cores within the cluster. This is specified by the user in the chunk function, but is required here to derive the
#segment of interest.

#lastchangelike, numchangecpts, lastchangecpts - arguments used in the dynamic programming setup of the PELT procedure to iterate through points,
#they correspond to the likelihood/cost at the last changepoint, the number of changepoints which have been estimated up to the point of interest,
#and the location of the most recent changepoint respectively.

#boundary - TRUE/FALSE (passed to this function by chunk), determines whether there will be an overlap between successive cores.

#############
#chunk_step2#
#############

#chunk_step2 is the `merge-phase' (i.e. the unparallelised part) of the chunk procedure. Here, the results from the first step of the Chunk procedure,
#calculated by chunk_step1 and returned in a cleaned format by the chunk wrapper function, are the candidate changepoints for the global changepoint
#problem.

#sumx - the matrix of summary statistics, as before

#pen - the penalty introduced when adding a changepoint into the model; this again will be fed to the procedure by the chunk wrapper function

#PRUNE - TRUE/FALSE, see above for details

#cost - see above for details

#minseglen - see above for details

#cptslocs - the set of candidate changepoint locations for the global time series under consideration as returned by all cores within the cluster
#from the first stage of the procedure

*****************
*cost.calculator*
*****************

#################
#cost.calculator#
#################

#cost.calculator calculates the squared error loss of a given segmentation. PELT should give the optimum cost for a given penalty.

#data - this is the data sequence on which the procedure was attempting to fit changepoints

#estimated.changes - the vector of changepoints estimated by the method within the sequence; this will have length at least two (0 and n, where 
#n is the length of the dataset, will always be included as estimated changes)

#penalty - penalty added to the overall cost when a changepoint is added to the model; the default is based on a change in mean under unknown variance

****************
*cost_functions*
****************

#########
#exp.sum#
#########

#the appropriate summary statistics in the exponential setting (when we assume a change in the rate parameter at true changes) - in this case, the cumulative sums are stored.

##########
#exp.cost#
##########

#cost based on a change in parameter for data distributed according to the exponential; tau is the current point, R is the most recent change and sumx is the vector of summary statistics

#########
#meandat#
#########

#feeder function - calculates mean of data

##########
#norm.sum#
##########

#the appropriate summary statistics in the normal setting (when we assume a change in one or both of the paramters) - in this case, the cumulative sums, the cumulative sums of squares and the squared residuals are calculated

###############
#norm.var.cost#
###############

#cost based on a change in variance for data distributed according to the normal

###################
#norm.meanvar.cost#
###################

#cost based on assumption that mean and/or variance can alter at a changepoint assuming that we again have Gaussian noise

*******************
*dataset_generator*
*******************

###########
#dataset_2#
###########

#dataset_2 generates a data stream with normal noise and randomly generated changes in mean, which affect a random subset of the variates

#num_variates - number of variates in the data stream; this is set to 1 for all experiments with respect to the parallelisation techniques

#num_timepoints - number of timepoints for which to simulate the series; this is the n referred to in other functions (length of dataset)

#subset_sparsity - a value between 0 and 1; at each randomly generated changepoint, any single variate will be affected by the change with
#probability according to the subset_sparsity, independently of whether the change affects other variates

#time_sparsity - a value between 0 and 1; the gap between successive changes is an exponential random variable with rate 1/(time_sparsity*n);
#therefore, 1/time_sparsity is the expected number of changepoints in the series

#sensitivity - in the case where determined = FALSE, this parameter determines how a change in mean manifests in probability; the change in 
#signal for a given variate which undergoes a change at a changepoint is distributed according to N(0,sensitivity^2)

#record - TRUE/FALSE; if TRUE, an S3 object is returned, with the first element being the generated dataset, the second being a vector of
#changepoints (this will just be n in the case where no true changes have been generated), and the final list element detailing how each change 
#affects each variate. This is given in the form of a matrix, and states how the signal alters for each variate at each changepoint. If FALSE,
#only the generated dataset is returned

#determined - TRUE/FALSE; please enter TRUE here if you wish to manually enter the magnitude of change desired at each changepoint (for each
#variate which undergoes a change), else the magnitude of the change will be determined by the draw from a centered normal distribution with 
#standard deviation corresponding to the sensitivity parameter (see above)

#determined.value - if determined has been entered as true, this is the desired magnitude of the change at each changepoint (up to a sign)

#new.seed - this seed determines the noise about the (possibly changing) signal

******
*deal*
******

######
#deal#
######

#the deal function is one of the two methods for parallelising PELT we propose. It works by segmenting the data sequence and passing segments to cores in the same manner as a card-dealer. That is, the first core receives the first point of the sequence, the second core receives the second point of the sequence and so on. If L is the number of cores, then the Lth core receives the Lth point, and the first core receives the (L+1)th point. In general, a data point in the kth position is received by the core with number corresponding to the remainder when dividing k by L. Each core then fits a changepoint model using only points which it has been `dealt' as candidate locations for the changes. The results are returned to the core which performed the segmentation, which then runs through the sequence once more to fit a global changepoint model, now only allowing candidate changepoints from the set of points returned as a changepoint by at least one core.

#data - this should be a sequence on which to search for changepoints

#penalty - the penalty term which is added to the model when a changepoint is introduced, in the same manner as for unparallelised PELT; the 
#default value is based on the assumption that we have a change in mean problem under Gaussian noise which is unknown. mad(data) estimates the
#standard deviation, and the 2 log((length(data))) term originates from corresponding theory.

#pruning - TRUE/FALSE, indicates whether (inequality-based) pruning will be carried out. As shown by Killick et al. (2012), for the PELT procedure 
#this will only affect the computational cost.

#sum.stat - this function determined which summary statistics will be calculated from the data, based on parametric assumptions. For a full list
#of options, please see the cost_functions.R file.

#cost - this function gives the cost of the segment base3d on the summary statistics reported from the sum.stat function, for example, in the normal
#change in mean setting, we take cost to be norm.mean.cost. Other options appear in the cost_functions.R file.

#ncores - the number of cores over which the method will be parallelised. The default is 2.

#minseglen - the minimum spacing between two successive changepoints. It is typical to take this as 2. In practice, as seen from the proof of
#Proposition 3.1 (the consistency of PELT in the change in mean setting under Gaussian noise), the minimum period required for no changes in
#the finite sample setting to ensure consistency is 2.

****************
*Deal_functions*
****************

#############
#deal_step1#
#############

#deal_step1 is the `split phase' function for the deal procedure, which takes the set of points 'dealt' to it by the deal function, and then fits a changepoint model using only these points as potential changepoint candidates. The arguments of the function are as follows:

#sumx - a matrix of salient summary statistics given to the function by the deal function. In the case of change in mean under normal noise, this includes the cumulative sum and the cumulative sums of squares

#pen - a penalty term; i.e. cost incurred for introducing a changepoint to the model; the deal procedure, which is a wrapper for this function, gives this a default value 2*\sigma^2*log(n), where \sigma^2 is an estimate of the variance (which, in a change in mean setting, is assumed to be constant, if perhaps unknown, across the time series)

#PRUNE - TRUE/FALSE; determines whether pruning in the style of PELT (i.e. inequality-based pruning) will take place. The main affect on the final answer will be a further reduction computational cost - there will be little or no impact on the fit returned by the method

#cost - segmented cost function from the cost_functions.R library. Please see cost_functions.R for a more thorough discussion

#sum.stat - vector/matrix of summary statistics to be used in the efficient execution of the procedure

#coreID - the number of the core within the cluster in which this function operates. This is given to the function by the deal wrapper

#ncores - the total number of cores within the cluster. This is specified by the user in the deal function, but is required here to derive the segment of interest

#lastchangelike, numchangecpts, lastchangecpts - arguments used in the dynamic programming setup of the PELT procedure to iterate through points, they correspond to the likelihood/cost at the last changepoint, the number of changepoints which have been estimated up to the point of interest, and the location of the most recent changepoint respectively

############
#deal_step2#
############

#deal_step2 is the `merge-phase' (i.e. the unparallelised part) of the deal procedure. Here, the results from the first step of the Deal procedure, calculated by deal_step1 and returned in a cleaned format by the deal wrapper function, are the candidate changepoints for the global changepoint problem.

#sumx - the matrix of summary statistics, as before

#pen - the penalty introduced when adding a changepoint into the model; this again will be fed to the procedure by the deal wrapper function

#PRUNE - TRUE/FALSE, see above for details

#cost - see above for details

#minseglen - The minimum spacing between two successive changepoints. Setting this to be at least 2 is advisable.

#cptslocs - the set of candidate changepoint locations for the global time series under consideration as returned by all cores within the cluster from the first stage of the procedure

********
*extras*
********

#################
#sim.study.selec#
#################

#sim.study.selec - an intermediate function used for the simulation study. It generates a univariate time series (using dataset_2) and then returns this for later use. The arguments are:

#length - desired length of the univariate time series

#subset - the subset sparsity of the resulting time series (see dataset_generator.R for more details); as the data are univariate, this input should be set to 1

#time - time sparsity of the resulting time series (see dataset_generator.R for more details); the expected number of generated changepoints in the series will be 1/time

#change.mag - the magnitude of the difference in the signal at a changepoint

#seed - this seed determines the locations/number of the changepoints

#second.seed - this seed determines the characteristics of the noise throughout the series

#######
#input#
#######

#input is a wrapper of sim.study.selec and performance.measure. It therefore generates the data, generates the estimated change set, and finally gives the performance measure set. The arguments are:

#Num_cores - the number of cores over which we wish to implement our parallel procedure (if appropriate)

#method - 1 corresponds to PELT, 2 to Chunk, 3 to Deal, 4 to WBS

#length, subset, time, change.mag, seed, second.seed - see above

******
*PELT*
******

###########
#just.PELT#
###########

#just.PELT carries out preliminaries in order to run the PELT procedure. It is the just.PELT function which is called by simulation study (and which should called by the practitioner, in place of the PELT function); just.PELT calculates salient summary statistics, runs PELT and then provides results of the same type as Chunk and Deal

#data - the data sequence on which we wish to search for changes

#penalty - penalty incurred to the cost for adding a changepoint to the model. The default used is the penalty for a change in mean under Gaussian noise with unknown variance

#pruning - TRUE/FALSE; if TRUE, some candidate changepoints will be removed from consideration at each stage of the procedue using inequality-based pruning

#sum.stat - set of salient summary statistics required for the efficient running of the algorithm, taken from the library found in cost_functions.R. The default used here is based on the assumption of normal noise

#cost - segmentation cost function (which, when added across segments and including the penalties for the estimated changepoints, will give a global cost for the segmentation); the default is based on the assumption of a change in mean problem under Gaussian noise

#minseglen - the minimum spacing between two consecutive changepoint; the recommended minimum value here is 2

#ncores - the number of cores (note that for PELT this argument is defunct - the number of cores is always assumed to be 1)

######
#PELT#
######

#PELT (Pruned Exact Linear Time) is a computationally efficient exact changepoint detection method first introduced by Killick et al. (2012). The arguments here are:

#sumx - vector/matrix of salient summary statistics

#pen - penalty incurred from introducing a changepoint to the model. This is given to PELT by just.PELT

#cost, minseglen - see above

#lastchangelike, numchangecpts, lastchangecpts - arguments used in the dynamic programming setup of the PELT procedure to iterate through points, they correspond to the likelihood/cost at the last changepoint, the number of changepoints which have been estimated up to the point of interest, and the location of the most recent changepoint respectively

*********************
*performance_measure*
*********************

#####################
#performance_measure#
#####################

#performance_measure takes a dataset, method number and the number of cores available as input, runs the method on the dataset, possibly utilising parallelisation (if the method is Chunk or Deal), and then compares the performance of the method to the truth, returning various metrics based on deviations from the true locations.

  #dataset - an S3 list object created by the function dataset_2 - the first element of the list is the sequence to which the method is to be applied, the second element of the list is the list of true changes (where these exist); the third element of the list is relevant only in a multivariate setting, which does not apply here.
  
  #method - this is an integer between 1 and 4, where 1 corresponds to PELT, 2 corresponds to Chunk, 3 corresponds to Deal and 4 corresponds to WBS. This is fed to this function by the input function, which in turn is fed to input from simulation.study, which receives this from the user.
  
  #N - this corresponds to the number of cores available, which is fed to this function by the input function, which in turn is fed to input from simulation.study, which receives this from the user.

***********************
*simstudyPAPERwithcost*
***********************

##################
#simulation.study#
##################

#simulation.study is the main function to run for the simulation study as seen in the paper, it generates the datasets, runs the procedure of choice, and then compares the output to the truth, reporting several headline performance metrics.

#NumReps is the number of repetitions - please ensure this is an integer. This is the number of times that a time series with changes at particular proportions (as determined by the function in dataset_generator) will have noise simulated around the signal, and therefore the number of times for which the procedure will run.

#LengthSeries - a required field. This is the length of the sequence to be examined. (To be passed to dataset_generator to be used as an input.)

#Method - please enter an integer between 1 and 4. 1 corresponds to PELT, 2 to Chunk, 3 to Deal, 4 to WBS.

#NumCores - please enter the number of cores across which you wish to parallelise the procedure (this is not equal to 1 only if Method = 2 or 3).
